# Supplementary material
Source: publisher figshare collection journal article supplement (https://gsapubs.figshare.com/ndownloader/files/22756133)
Supplement: Supplementary file 1 [file 22756133]

APPENDIX 1. PALEOSOL CARBONATE ISOTOPE DATA FROM THE  
SOUTHERN BIGHORN BASIN

| Locality     | NN <sup>S</sup> | PMS <sup>T</sup> | Level<br>(m) | Age<br>(Ma) | $\delta^{13}\text{C}$<br>(‰,PDB) | $\delta^{18}\text{O}$<br>(‰,PDB) |
|--------------|-----------------|------------------|--------------|-------------|----------------------------------|----------------------------------|
| PK 072590:L2 | 1A              | N.A.             | 728          | 52.56       | -10.0                            | -8.9                             |
| "            | 1B              | N.A.             | "            | "           | -9.7                             | -8.6                             |
| "            | 2A              | N.A.             | "            | "           | -9.8                             | -8.8                             |
| "            | 2B              | N.A.             | "            | "           | -9.9                             | -8.9                             |
| PK 072590:L1 | 1A              | N.A.             | 690          | 52.66       | -9.7                             | -8.5                             |
| "            | 1B              | N.A.             | "            | "           | -9.4                             | -8.0                             |
| "            | 2A              | N.A.             | "            | "           | -9.3                             | -8.5                             |
| "            | 2B              | N.A.             | "            | "           | -9.3                             | -8.3                             |
| SLW – Fern Q | 1A              | N.A.             | 616          | 52.85       | -10.1                            | -9.1                             |
| "            | 1B              | N.A.             | "            | "           | -9.6                             | -8.8                             |
| "            | 1C              | N.A.             | "            | "           | -10.0                            | -8.9                             |
| "            | 2A              | N.A.             | "            | "           | -10.0                            | -8.9                             |
| "            | 2B              | N.A.             | "            | "           | -10.2                            | -9.1                             |
| YPM 3        | 1A              | N.A.             | 601          | 52.88       | -9.1                             | -8.5                             |
| "            | 1B              | N.A.             | "            | "           | -9.2                             | -8.6                             |
| "            | 2A              | N.A.             | "            | "           | -9.3                             | -8.6                             |
| "            | 2B              | N.A.             | "            | "           | -9.4                             | -8.9                             |
| YPM 1        | 1A              | N.A.             | 571          | 52.96       | -11.2                            | -8.3                             |
| "            | 1B              | N.A.             | "            | "           | -11.4                            | -8.3                             |
| "            | 2A              | N.A.             | "            | "           | -11.1                            | -8.5                             |
| "            | 2B              | N.A.             | "            | "           | -11.1                            | -8.1                             |
| YPM 36       | 1A              | N.A.             | 521          | 53.09       | -10.9                            | -8.9                             |
| "            | 1B              | N.A.             | "            | "           | -10.1                            | -9.0                             |
| "            | 1C              | N.A.             | "            | "           | -11.2                            | -9.5                             |
| "            | 1D              | N.A.             | "            | "           | -10.2                            | -9.2                             |
| "            | 2A              | N.A.             | "            | "           | -10.4                            | -9.2                             |
| "            | 2B              | N.A.             | "            | "           | -10.4                            | -9.3                             |
| YPM 39       | 1A              | 4H               | 501          | 53.14       | -11.9                            | -8.3                             |
| "            | 1B              | "                | "            | "           | -11.3                            | -8.2                             |
| "            | 2A              | "                | "            | "           | -11.3                            | -8.2                             |
| "            | 2B              | "                | "            | "           | -11.5                            | -8.2                             |
| D1434        | 1A              | N.A.             | 496          | 53.15       | -10.5                            | -8.2                             |
| "            | 1B              | N.A.             | "            | "           | -10.7                            | -7.9                             |
| MBF 41       | 1A              | N.A.             | 491          | 53.16       | -11.3                            | -8.5                             |
| "            | 1B              | N.A.             | "            | "           | -11.2                            | -8.1                             |
| "            | 2A              | N.A.             | "            | "           | -11.2                            | -7.9                             |
| "            | 2B              | N.A.             | "            | "           | -11.1                            | -7.9                             |
| D1162        | 1A              | 3+H              | 481          | 53.19       | -10.1                            | -9.7                             |
| "            | 1B              | "                | "            | "           | -10.1                            | -9.5                             |
| "            | 2A              | "                | "            | "           | -9.9                             | -8.8                             |
| D1250        | 1A              | 4+H              | 461          | 53.24       | -9.6                             | -9.0                             |
| "            | 1B              | "                | "            | "           | -10.6                            | -8.8                             |
| "            | 1C              | "                | "            | "           | -10.9                            | -9.5                             |
| "            | 2A              | "                | "            | "           | -10.0                            | -9.2                             |
| D1204        | 1A              | 3                | 442          | 53.29       | -11.6                            | -8.7                             |
| "            | 1B              | "                | "            | "           | -11.4                            | -8.5                             |
| "            | 2A              | "                | "            | "           | -11.0                            | -8.4                             |
| "            | 2B              | "                | "            | "           | -11.0                            | -8.2                             |
| "            | 2C              | "                | "            | "           | -11.3                            | -9.5                             |
| "            | 2D              | "                | "            | "           | -11.2                            | -8.6                             |
| YPM 320      | 1A              | 1                | 423          | 53.34       | -12.1                            | -8.4                             |
| "            | 1B              | "                | "            | "           | -12.9                            | -10.0                            |
| "            | 2A              | "                | "            | "           | -12.2                            | -7.9                             |
| "            | 2B              | "                | "            | "           | -12.5                            | -8.1                             |
| D1217+10m    | 1A              | N.A.             | 422          | 53.34       | -11.4                            | -8.5                             |
| "            | 1B              | N.A.             | "            | "           | -11.7                            | -8.7                             |
| "            | 2A              | N.A.             | "            | "           | -11.4                            | -8.8                             |
| "            | 2B              | N.A.             | "            | "           | -11.5                            | -8.6                             |
| D1217+3m     | 1A              | 1                | 415          | 53.36       | -9.9                             | -8.4                             |
| "            | 1B              | "                | "            | "           | -9.4                             | -9.0                             |
| "            | 2A              | "                | "            | "           | -10.3                            | -8.9                             |
| "            | 2B              | "                | "            | "           | -10.1                            | -8.9                             |
| D1410*       | 1A              | N.A.             | 414          | 53.36       | -11.7                            | -8.1                             |
| "            | 1B              | N.A.             | "            | "           | -11.6                            | -8.1                             |
| "            | 1C              | N.A.             | "            | "           | -11.2                            | -8.1                             |
| D1350        | 1A              | 1                | 408          | 53.38       | -12.4                            | -8.4                             |
| "            | 1B              | "                | "            | "           | -12.0                            | -8.4                             |
| "            | 2A              | "                | "            | "           | -11.6                            | -8.3                             |

|             |    |      |       |       |       |       |
|-------------|----|------|-------|-------|-------|-------|
| "           | 2B | "    | "     | "     | -11.6 | -8.3  |
| YPM 220     | 1A | N.A. | 405   | 53.38 | -11.6 | -8.4  |
| "           | 1B | N.A. | "     | "     | -11.5 | -8.4  |
| "           | 2A | N.A. | "     | "     | -11.8 | -8.3  |
| "           | 2B | N.A. | "     | "     | -11.4 | -8.3  |
| YPM 271     | 1A | N.A. | 400   | 53.40 | -11.9 | -8.3  |
| "           | 1B | N.A. | "     | "     | -12.2 | -8.6  |
| "           | 2A | N.A. | "     | "     | -12.5 | -8.5  |
| "           | 2B | N.A. | "     | "     | -12.2 | -8.6  |
| D1716*      | 1A | N.A. | 397   | 53.40 | -10.9 | -10.2 |
| "           | 1B | N.A. | "     | "     | -10.2 | -8.8  |
| "           | 1C | N.A. | "     | "     | -9.3  | -11.1 |
| "           | 1D | N.A. | "     | "     | -9.5  | -8.8  |
| "           | 1E | N.A. | "     | "     | -9.8  | -8.4  |
| YPM 127     | 1A | N.A. | 390   | 53.42 | -11.7 | -8.3  |
| "           | 1B | N.A. | "     | "     | -11.7 | -8.2  |
| "           | 2A | N.A. | "     | "     | -11.6 | -9.0  |
| "           | 2B | N.A. | "     | "     | -11.6 | -8.8  |
| D1341       | 1A | 2+H  | 384   | 53.44 | -9.5  | -8.6  |
| "           | 1B | "    | "     | "     | -9.4  | -8.6  |
| "           | 2A | "    | "     | "     | -9.7  | -8.1  |
| "           | 2B | "    | "     | "     | -9.6  | -8.1  |
| D1200       | 1A | 3+   | 370   | 53.47 | -9.5  | -8.8  |
| "           | 1B | "    | "     | "     | -9.6  | -8.5  |
| "           | 2A | "    | "     | "     | -9.5  | -8.4  |
| "           | 2B | "    | "     | "     | -10.7 | -8.1  |
| D 1493      | 1A | N.A. | 344   | 53.57 | -11.4 | -8.3  |
| D1289       | 1A | 3    | 342   | 53.58 | -10.7 | -8.9  |
| "           | 1B | "    | "     | "     | -10.6 | -8.9  |
| "           | 2A | "    | "     | "     | -9.1  | -9.0  |
| "           | 2B | "    | "     | "     | -9.4  | -8.7  |
| YPM 458     | 1A | 4+   | 324   | 53.65 | -8.5  | -8.7  |
| "           | 1B | "    | "     | "     | -8.3  | -8.5  |
| "           | 2A | "    | "     | "     | -8.4  | -8.8  |
| "           | 2B | "    | "     | "     | -8.4  | -8.6  |
| D1931*      | 1A | N.A. | 315   | 53.69 | -8.9  | -8.0  |
| "           | 1B | N.A. | "     | "     | -8.9  | -8.1  |
| D1393+16.5m | 1A | 3H   | 313   | 53.70 | -9.8  | -9.0  |
| "           | 1B | "    | "     | "     | -9.7  | -8.9  |
| "           | 2A | "    | "     | "     | -9.2  | -8.4  |
| "           | 2B | "    | "     | "     | -9.2  | -8.5  |
| D1369       | 1A | 5    | 292   | 53.78 | -10.4 | -9.7  |
| "           | 1B | "    | "     | "     | -10.5 | -8.3  |
| "           | 2A | "    | "     | "     | -10.7 | -9.7  |
| "           | 2B | "    | "     | "     | -10.2 | -8.6  |
| D1389       | 1A | 1    | 264   | 53.90 | -9.0  | -8.2  |
| "           | 1B | "    | "     | "     | -9.2  | -8.3  |
| "           | 2A | "    | "     | "     | -8.7  | -8.5  |
| "           | 2B | "    | "     | "     | -8.5  | -8.3  |
| "           | 3A | "    | "     | "     | -9.5  | -8.1  |
| YPM 373     | 1A | N.A. | 250   | 53.95 | -8.2  | -8.3  |
| "           | 1B | N.A. | "     | "     | -8.3  | -8.6  |
| "           | 2A | N.A. | "     | "     | -8.5  | -8.4  |
| "           | 2B | N.A. | "     | "     | -8.4  | -8.4  |
| YPM 212     | 1A | 2H   | 230   | 54.04 | -9.1  | -8.3  |
| "           | 1B | "    | "     | "     | -9.2  | -8.2  |
| "           | 1C | "    | "     | "     | -9.1  | -8.2  |
| YPM 290N    | 1A | 1    | 210   | 54.12 | -9.7  | -8.6  |
| "           | 1B | "    | "     | "     | -9.6  | -8.7  |
| "           | 2A | "    | "     | "     | -9.4  | -10.1 |
| "           | 2B | "    | "     | "     | -8.8  | -8.3  |
| YPM 363     | 1A | 2    | 190   | 54.20 | -10.1 | -8.4  |
| "           | 1B | "    | "     | "     | -10.3 | -8.5  |
| "           | 2A | "    | "     | "     | -9.9  | -7.9  |
| "           | 2B | "    | "     | "     | -9.8  | -7.8  |
| PK-N-22     | 1A | N.A. | 174.5 | 54.26 | -9.4  | -8.1  |
| "           | 1B | N.A. | "     | "     | -9.4  | -8.0  |
| "           | 2A | N.A. | "     | "     | -8.9  | -8.7  |
| "           | 2B | N.A. | "     | "     | -10.3 | -7.8  |
| YPM 389+2m  | 1A | 1    | 172   | 54.27 | -9.5  | -8.2  |
| "           | 1B | "    | "     | "     | -10.6 | -9.2  |
| "           | 2A | "    | "     | "     | -11.3 | -10.5 |
| "           | 2B | "    | "     | "     | -10.8 | -9.8  |
| YPM 389     | 1A | 1    | 170   | 54.28 | -8.6  | -9.4  |

|                  |    |      |     |       |       |       |
|------------------|----|------|-----|-------|-------|-------|
| "                | 1B | "    | "   | "     | -8.7  | -8.7  |
| "                | 2A | "    | "   | "     | -10.9 | -10.3 |
| "                | 2B | "    | "   | "     | -11.1 | -10.5 |
| YPM 92           | 1A | N.A. | 140 | 54.40 | -11.6 | -9.3  |
| "                | 1B | N.A. | "   | "     | -9.6  | -8.1  |
| "                | 2A | N.A. | "   | "     | -10.6 | -8.6  |
| "                | 2B | N.A. | "   | "     | -9.7  | -8.2  |
| YPM 207          | 1A | 1+   | 140 | 54.40 | -10.0 | -8.5  |
| "                | 1B | "    | "   | "     | -9.9  | -8.2  |
| "                | 2A | "    | "   | "     | -9.9  | -8.5  |
| "                | 2B | "    | "   | "     | -10.1 | -8.5  |
| PK-N-17          | 1A | N.A. | 130 | 54.44 | -10.1 | -8.1  |
| "                | 1B | N.A. | "   | "     | -9.8  | -7.6  |
| "                | 2A | N.A. | "   | "     | -9.8  | -7.6  |
| "                | 2B | N.A. | "   | "     | -9.5  | -7.6  |
| YPM 205+19m      | 1A | 1    | 119 | 54.49 | -9.9  | -8.6  |
| "                | 1B | "    | "   | "     | -9.9  | -8.4  |
| "                | 2A | "    | "   | "     | -8.9  | -8.4  |
| "                | 2B | "    | "   | "     | -9.5  | -8.4  |
| YPM 200+4m       | 1A | 1+   | 84  | 54.63 | -11.0 | -8.4  |
| "                | 1B | "    | "   | "     | -12.8 | -7.0  |
| YPM95            | 1A | N.A. | 50  | 54.77 | -10.5 | -9.0  |
| "                | 1B | N.A. | "   | "     | -10.5 | -9.1  |
| "                | 1C | N.A. | "   | "     | -10.4 | -8.8  |
| YPM95            | 2A | N.A. | "   | "     | -10.1 | -7.8  |
| "                | 2B | N.A. | "   | "     | -9.8  | -7.5  |
| PK-N-9           | 1A | N.A. | 47  | 54.78 | -13.5 | -7.6  |
| "                | 1B | N.A. | "   | "     | -13.6 | -7.5  |
| "                | 1C | N.A. | "   | "     | -14.1 | -6.4  |
| "                | 1D | N.A. | "   | "     | -14.7 | -7.4  |
| "                | 2A | N.A. | "   | "     | -14.3 | -6.3  |
| "                | 2B | N.A. | "   | "     | -13.8 | -5.8  |
| PK-N-8           | 1A | N.A. | 35  | 54.83 | -12.7 | -7.8  |
| "                | 1B | N.A. | "   | "     | -13.1 | -7.8  |
| "                | 2A | N.A. | "   | "     | -13.4 | -6.7  |
| "                | 2B | N.A. | "   | "     | -12.9 | -7.7  |
| PK-N-7           | 1A | N.A. | 20  | 54.89 | -14.3 | -7.4  |
| "                | 1B | N.A. | "   | "     | -14.3 | -7.2  |
| "                | 2A | N.A. | "   | "     | -13.9 | -7.1  |
| "                | 2B | N.A. | "   | "     | -14.4 | -6.6  |
| PK-N-6           | 1A | N.A. | 9   | 54.94 | -13.7 | -7.7  |
| "                | 1B | N.A. | "   | "     | -14.2 | -7.8  |
| D 1887           | 1A | N.A. | 5   | 54.95 | -14.1 | -7.7  |
| "                | 1B | N.A. | "   | "     | -13.1 | -8.1  |
| "                | 2A | N.A. | "   | "     | -12.4 | -8.2  |
| "                | 2B | N.A. | "   | "     | -12.9 | -8.0  |
| <b>Spar Data</b> |    |      |     |       |       |       |
| YPM 39           | S1 |      | 501 | 53.14 | -13.8 | -12.3 |
| D1162            | S1 | 3+H  | 481 | 53.19 | -17.3 | -16.0 |
| "                | S2 | "    | "   | "     | -15.7 | -16.8 |
| D1250            | S1 | 4+H  | 461 | 53.24 | -11.5 | -20.9 |
| "                | S2 | "    | "   | "     | -10.9 | -20.2 |
| YPM 320          | S1 | 1    | 423 | 53.34 | -12.4 | -18.9 |
| YPM 220          | S  | N.A. | 405 | 53.38 | -12.8 | -19.8 |
| YPM 271          | S  | N.A. | 400 | 53.40 | -10.8 | -7.6  |
| YPM 363          | S  | N.A. | 190 | 54.20 | -10.4 | -7.9  |
| YPM 200+4m       | S1 | 1+   | 84  | 54.63 | -19.2 | -9.8  |
| "                | S2 | "    | "   | "     | -19.6 | -9.7  |
| PK-N-6           | S1 | N.A. | 9   | 54.94 | -24.7 | -14.8 |
| "                | S2 | N.A. | "   | "     | -24.7 | -14.7 |

<sup>§</sup>NN = Nodule sample number, where each number represents a different soil nodule from the same locality, and letters indicate separate samples from the same nodule.

\* = data for bone encrusting micrite from Bao et al. (1998).

S = data from sparry cement.

<sup>†</sup>PMS, Paleosol Maturity Scale ranges from 1 (least mature) to 5 (most mature) (Bown and Kraus, 1987), H indicates a hydromorphic soil.

N.A. = data were not available.

#### REFERENCES CITED

- Bao, H., Koch, P.L., and Hepple, R.P., 1998, Hematite and calcite coatings on fossil vertebrates: *Journal of Sedimentary Research A*, v. 68, p. 727-738.
- Bown, T.M., and Kraus, M.J., 1987, Intergration of channel and flood-plain suites, I: Developmental sequence and lateral relations of alluvial paleosols: *Journal of Sedimentary Petrology*, v. 57, p. 587-601.

APPENDIX 2. SOIL CARBONATE ISOTOPE DATA  
FROM THE McCULLOUGH PEAKS

| Locality       | N  | Level<br>(m) | Age<br>(Ma) | $\delta^{13}\text{C}$<br>(‰,PDB) | $\delta^{18}\text{O}$<br>(‰,PDB) |
|----------------|----|--------------|-------------|----------------------------------|----------------------------------|
| WC-Nods-92041N | 1A | 2566         | 52.68       | -11.2                            | -7.8                             |
| "              | 1B | "            | "           | -11.0                            | -7.6                             |
| "              | 2A | "            | "           | -10.9                            | -7.4                             |
| "              | 2B | "            | "           | -11.0                            | -7.5                             |
| "              | 3A | "            | "           | -11.1                            | -8.9                             |
| "              | 4A | "            | "           | -11.1                            | -7.7                             |
| "              | 5A | "            | "           | -11.1                            | -7.2                             |
| "              | 6A | "            | "           | -10.9                            | -7.4                             |
| WC-Nods-92040N | 1A | 2557         | 52.69       | -10.5                            | -9.2                             |
| "              | 1B | "            | "           | -10.2                            | -9.3                             |
| "              | 2A | "            | "           | -10.6                            | -8.4                             |
| "              | 2B | "            | "           | -10.3                            | -9.1                             |
| WC-Nods-92039N | 1A | 2452         | 52.85       | -10.4                            | -7.8                             |
| "              | 1B | "            | "           | -10.3                            | -7.9                             |
| "              | 2A | "            | "           | -10.0                            | -7.7                             |
| "              | 2B | "            | "           | -10.2                            | -7.6                             |
| WC-Nods-92038N | 1A | 2437         | 52.88       | -10.8                            | -8.1                             |
| "              | 1B | "            | "           | -10.6                            | -7.9                             |
| "              | 2A | "            | "           | -10.1                            | -7.7                             |
| "              | 2B | "            | "           | -10.6                            | -7.8                             |
| "              | 3A | "            | "           | -10.3                            | -7.9                             |
| "              | 3B | "            | "           | -10.5                            | -7.8                             |
| "              | 3C | "            | "           | -10.4                            | -7.8                             |
| "              | 3D | "            | "           | -9.9                             | -7.5                             |
| WC-Nods-92036N | 1A | 2385         | 52.95       | -10.0                            | -8.1                             |
| "              | 1B | "            | "           | -9.7                             | -8.3                             |
| "              | 2A | "            | "           | -9.7                             | -8.0                             |
| "              | 2B | "            | "           | -9.7                             | -8.0                             |
| WC-Nods-92037N | 1A | 2375         | 52.97       | -8.5                             | -8.6                             |
| "              | 1B | "            | "           | -8.4                             | -8.5                             |
| "              | 2A | "            | "           | -8.6                             | -8.2                             |
| "              | 2B | "            | "           | -8.3                             | -8.2                             |
| WC-Nods-92035N | 1A | 2332         | 53.03       | -10.6                            | -8.1                             |
| "              | 1B | "            | "           | -10.7                            | -8.0                             |
| "              | 2A | "            | "           | -10.2                            | -8.5                             |
| "              | 2B | "            | "           | -10.4                            | -8.0                             |
| WC-Nods-92034N | 1A | 2327         | 53.03       | -12.4                            | -7.9                             |
| "              | 1B | "            | "           | -12.6                            | -7.7                             |
| "              | 2A | "            | "           | -11.7                            | -8.4                             |
| "              | 2B | "            | "           | -11.8                            | -8.6                             |
| WC-Nods-92033N | 1A | 2256         | 53.13       | -9.2                             | -8.1                             |
| "              | 1B | "            | "           | -9.4                             | -8.5                             |
| "              | 2A | "            | "           | -8.9                             | -8.6                             |
| "              | 2B | "            | "           | -9.4                             | -8.2                             |
| WC-Nods-92031N | 1A | 2194         | 53.22       | -10.1                            | -8.1                             |
| "              | 1B | "            | "           | -9.9                             | -8.4                             |
| "              | 2A | "            | "           | -9.9                             | -8.3                             |
| "              | 2B | "            | "           | -9.7                             | -8.0                             |
| "              | 3A | "            | "           | -9.3                             | -10.3                            |
| "              | 4A | "            | "           | -9.9                             | -8.3                             |
| WC-Nods-92031N | 5A | 2194         | 53.22       | -10.7                            | -8.5                             |
| "              | 6A | "            | "           | -10.2                            | -8.3                             |
| WC-Nods-92032N | 1A | 2179         | 53.24       | -9.1                             | -8.3                             |
| "              | 1B | "            | "           | -9.1                             | -8.3                             |
| WC-Nods-92032N | 2A | 2179         | 53.24       | -9.0                             | -8.4                             |
| "              | 2B | "            | "           | -9.1                             | -8.1                             |
| "              | 3A | "            | "           | -9.5                             | -8.2                             |
| "              | 3B | "            | "           | -8.4                             | -8.4                             |
| "              | 3C | "            | "           | -8.3                             | -8.3                             |
| "              | 3D | "            | "           | -8.6                             | -8.3                             |
| "              | 4A | "            | "           | -8.9                             | -8.3                             |
| "              | 5A | "            | "           | -8.8                             | -8.3                             |
| "              | 6A | "            | "           | -9.0                             | -8.3                             |
| WC-Nods-92030N | 1A | 2165         | 53.26       | -9.1                             | -7.7                             |
| "              | 1B | "            | "           | -9.2                             | -7.6                             |
| "              | 2A | "            | "           | -9.4                             | -8.0                             |
| "              | 2B | "            | "           | -9.2                             | -8.1                             |

|                |    |      |       |       |      |
|----------------|----|------|-------|-------|------|
| WC-Nods-92029N | 1A | 2117 | 53.32 | -9.8  | -9.1 |
| "              | 1B | "    | "     | -9.3  | -8.5 |
| "              | 2A | "    | "     | -9.6  | -9.7 |
| "              | 2B | "    | "     | -9.6  | -9.0 |
| WC-Nods-92028N | 1A | 2112 | 53.33 | -10.0 | -7.7 |
| "              | 1B | "    | "     | -9.9  | -7.7 |
| "              | 2A | "    | "     | -9.0  | -8.3 |
| "              | 2B | "    | "     | -9.2  | -8.2 |
| "              | 3A | "    | "     | -9.5  | -8.2 |
| "              | 3B | "    | "     | -9.6  | -8.2 |
| "              | 3C | "    | "     | -9.5  | -8.2 |
| "              | 3D | "    | "     | -9.5  | -8.2 |
| WC-Nods-92027N | 1A | 2108 | 53.34 | -12.0 | -8.0 |
| "              | 1B | "    | "     | -12.0 | -7.8 |
| "              | 2A | "    | "     | -10.9 | -8.5 |
| "              | 2B | "    | "     | -11.7 | -8.4 |
| WC-Nods-92025N | 1A | 2098 | 53.35 | -10.2 | -7.8 |
| "              | 1B | "    | "     | -10.5 | -8.0 |
| "              | 2A | "    | "     | -10.9 | -8.0 |
| "              | 2B | "    | "     | -10.7 | -7.6 |
| WC-Nods-92026N | 1A | 2093 | 53.36 | -9.2  | -8.5 |
| "              | 1B | "    | "     | -9.3  | -8.5 |
| "              | 2A | "    | "     | -9.0  | -8.3 |
| "              | 2B | "    | "     | -8.9  | -8.5 |
| WC-Nods-92023N | 1A | 2084 | 53.37 | -10.2 | -7.9 |
| "              | 1B | "    | "     | -10.5 | -8.1 |
| "              | 2A | "    | "     | -9.5  | -8.1 |
| "              | 2B | "    | "     | -9.8  | -8.5 |
| WC-Nods-92022N | 1A | 2041 | 53.43 | -9.1  | -7.5 |
| "              | 1B | "    | "     | -8.9  | -7.3 |
| "              | 2A | "    | "     | -10.6 | -8.1 |
| "              | 2B | "    | "     | -10.7 | -8.1 |
| WC-Nods-92021N | 1A | 2036 | 53.42 | -9.5  | -8.5 |
| "              | 1B | "    | "     | -9.5  | -8.8 |
| "              | 2A | "    | "     | -9.7  | -8.4 |
| "              | 2B | "    | "     | -9.1  | -8.5 |
| "              | 3A | "    | "     | -9.4  | -8.4 |
| "              | 4A | "    | "     | -9.3  | -8.3 |
| "              | 5A | "    | "     | -9.1  | -8.3 |
| "              | 6A | "    | "     | -9.4  | -8.1 |
| WC-Nods-92020N | 1A | 2022 | 53.45 | -9.4  | -8.5 |
| "              | 1B | "    | "     | -9.6  | -8.4 |
| "              | 2A | "    | "     | -8.9  | -8.2 |
| "              | 2B | "    | "     | -8.9  | -8.3 |
| WC-Nods-92018N | 1A | 2006 | 53.47 | -9.1  | -8.4 |
| "              | 1B | "    | "     | -9.2  | -8.5 |
| "              | 2A | "    | "     | -8.7  | -7.9 |
| "              | 2B | "    | "     | -8.8  | -7.9 |
| WC-Nods-92017N | 1A | 1998 | 53.49 | -9.4  | -8.1 |
| "              | 1B | "    | "     | -9.0  | -8.3 |
| "              | 2A | "    | "     | -9.1  | -8.1 |
| "              | 2B | "    | "     | -9.1  | -8.2 |
| WC-Nods-92019N | 1A | 1993 | 53.50 | -9.4  | -8.5 |
| "              | 1B | "    | "     | -9.9  | -9.3 |
| "              | 2A | "    | "     | -9.5  | -8.6 |
| "              | 2B | "    | "     | -9.3  | -8.7 |
| WC-Nods-92015N | 1A | 1993 | 53.50 | -9.9  | -8.8 |
| "              | 1B | "    | "     | -10.2 | -8.7 |
| "              | 2A | "    | "     | -9.3  | -8.4 |
| "              | 2B | "    | "     | -9.6  | -8.6 |
| WC-Nods-92016N | 1A | 1979 | 53.52 | -11.3 | -8.5 |
| "              | 1B | "    | "     | -11.3 | -8.4 |
| "              | 2A | "    | "     | -9.8  | -8.6 |
| "              | 2B | "    | "     | -9.5  | -8.4 |
| WC-Nods-92014N | 1A | 1969 | 53.54 | -10.4 | -8.4 |
| "              | 1B | "    | "     | -10.2 | -7.9 |
| "              | 2A | "    | "     | -9.8  | -8.3 |
| "              | 2B | "    | "     | -9.6  | -7.8 |
| "              | 3A | "    | "     | -9.9  | -8.1 |
| "              | 3B | "    | "     | -9.9  | -8.4 |
| "              | 3C | "    | "     | -9.9  | -8.1 |
| "              | 3D | "    | "     | -9.9  | -8.5 |
| WC-Nods-92013N | 1A | 1959 | 53.56 | -8.6  | -8.7 |
| "              | 1B | "    | "     | -8.6  | -8.7 |

|                |    |      |       |       |      |
|----------------|----|------|-------|-------|------|
| "              | 2A | "    | "     | -8.5  | -8.5 |
| "              | 2B | "    | "     | -8.5  | -8.4 |
| WC-Nods-92012N | 1A | 1950 | 53.58 | -9.3  | -8.7 |
| "              | 1B | "    | "     | -9.2  | -8.8 |
| "              | 2A | "    | "     | -9.1  | -8.9 |
| "              | 2B | "    | "     | -8.9  | -8.4 |
| WC-Nods-92009N | 1A | 1945 | 53.59 | -8.9  | -8.8 |
| "              | 1B | "    | "     | -9.0  | -8.4 |
| WC-Nods-92009N | 2A | 1945 | 53.59 | -8.9  | -8.1 |
| "              | 2B | "    | "     | -8.9  | -8.2 |
| WC-Nods-92008N | 1A | 1921 | 53.63 | -8.2  | -8.4 |
| "              | 1B | "    | "     | -8.1  | -8.4 |
| "              | 2A | "    | "     | -9.0  | -8.0 |
| "              | 2B | "    | "     | -8.7  | -8.2 |
| "              | 3A | "    | "     | -8.3  | -8.1 |
| "              | 3B | "    | "     | -8.3  | -8.0 |
| "              | 3C | "    | "     | -8.3  | -8.2 |
| "              | 3D | "    | "     | -8.4  | -8.2 |
| WC-Nods-92010N | 1A | 1907 | 53.66 | -8.8  | -8.3 |
| "              | 1B | "    | "     | -8.8  | -8.4 |
| "              | 2A | "    | "     | -8.8  | -8.1 |
| "              | 2B | "    | "     | -9.0  | -8.9 |
| WC-Nods-92024N | 1A | 1883 | 53.70 | -8.5  | -8.3 |
| "              | 1B | "    | "     | -8.5  | -7.9 |
| "              | 2A | "    | "     | -9.4  | -8.5 |
| "              | 2B | "    | "     | -8.8  | -8.5 |
| WC-Nods-92011N | 1A | 1816 | 53.83 | -9.2  | -8.3 |
| "              | 1B | "    | "     | -9.4  | -8.5 |
| "              | 2A | "    | "     | -9.0  | -8.2 |
| "              | 2B | "    | "     | -8.9  | -8.1 |
| "              | 3A | "    | "     | -8.9  | -8.4 |
| "              | 4A | "    | "     | -9.4  | -8.1 |
| "              | 5A | "    | "     | -8.8  | -8.6 |
| "              | 6A | "    | "     | -9.5  | -8.3 |
| WC-Nods-92007N | 1A | 1740 | 53.97 | -9.8  | -8.1 |
| "              | 1B | "    | "     | -9.8  | -7.8 |
| "              | 2A | "    | "     | -9.7  | -8.0 |
| "              | 2B | "    | "     | -9.6  | -7.9 |
| WC-Nods-92005N | 1A | 1558 | 54.30 | -9.0  | -8.6 |
| "              | 1B | "    | "     | -9.1  | -8.7 |
| "              | 2A | "    | "     | -8.2  | -7.7 |
| "              | 2B | "    | "     | -8.3  | -7.9 |
| WC-Nods-92006N | 1A | 1549 | 54.32 | -10.1 | -8.8 |
| "              | 1B | "    | "     | -10.2 | -8.7 |
| "              | 2A | "    | "     | -9.9  | -8.4 |
| "              | 2B | "    | "     | -9.9  | -8.4 |
| WC-Nods-92004N | 1A | 1453 | 54.50 | -9.1  | -8.1 |
| "              | 1B | "    | "     | -8.8  | -8.1 |
| "              | 2A | "    | "     | -8.8  | -8.1 |
| "              | 2B | "    | "     | -9.6  | -8.4 |
| WC-Nods-92003N | 1A | 1328 | 54.73 | -9.0  | -7.8 |
| "              | 1B | "    | "     | -9.5  | -7.9 |
| "              | 2A | "    | "     | -9.0  | -7.7 |
| "              | 2B | "    | "     | -8.9  | -7.7 |
| WC-Nods-92002N | 1A | 1300 | 54.78 | -9.6  | -8.0 |
| "              | 1B | "    | "     | -9.6  | -7.8 |
| "              | 2A | "    | "     | -9.5  | -8.0 |
| "              | 2B | "    | "     | -9.5  | -7.9 |
| WC-Nods-92002N | 3A | 1300 | 54.78 | -9.6  | -8.0 |
| "              | 4A | "    | "     | -9.5  | -8.2 |
| "              | 5A | "    | "     | -10.2 | -7.6 |
| "              | 6A | "    | "     | -9.1  | -7.9 |
| FG 61-2        | 1A | 1204 | 54.96 | -15.1 | -7.7 |
| WC-Nods-92001N | 1A | 1195 | 54.97 | -14.8 | -7.2 |
| "              | 1B | "    | "     | -15.9 | -7.7 |
| "              | 2A | "    | "     | -14.9 | -7.4 |
| "              | 2B | "    | "     | -15.2 | -7.4 |
| FG 61-1        | 1A | 1195 | 54.97 | -15.7 | -7.7 |
| "              | 1B | "    | "     | -15.5 | -7.9 |

Note: Same as for Appendix 1.

APPENDIX 3. ORGANIC MATTER  
ISOTOPE VALUES

| Locality                 | Type    | Level<br>(m) | Age<br>(Ma) | $\delta^{13}\text{C}$<br>(‰,PDB) |
|--------------------------|---------|--------------|-------------|----------------------------------|
| <b>Clarks Fork Basin</b> |         |              |             |                                  |
| SC 295                   | Nod Org | 2210         | 53.55       | -25.2                            |
| SC 303                   | Nod Org | 2110         | 53.75       | -24.7                            |
| SC 148                   | Nod Org | 2050         | 53.88       | -25.7                            |
| SC 112                   | Nod Org | 2020         | 53.94       | -24.9                            |
| SC 111                   | Nod Org | 2005         | 53.97       | -25.0                            |
| SC 35                    | Nod Org | 1870         | 54.25       | -24.7                            |
| SC 33                    | Nod Org | 1840         | 54.31       | -24.8                            |
| SC 224                   | Nod Org | 1815         | 54.36       | -24.5                            |
| SC 133                   | Nod Org | 1750         | 54.50       | -24.9                            |
| SC 160                   | Nod Org | 1720         | 54.56       | -25.1                            |
| SC 15                    | Nod Org | 1630         | 54.75       | -24.8                            |
| SLW 9812                 | Cuticle | 1570         | 54.87       | -23.8                            |
| SC 4                     | Nod Org | 1570         | 54.87       | -24.9                            |
| SC67-NOD9                | Nod Org | 1560         | 54.89       | -25.0                            |
| SC67-NOD8                | Nod Org | 1549         | 54.91       | -25.1                            |
| SC351-NOD6               | Nod Org | 1538         | 54.94       | -25.0                            |
| SC351-NOD5               | Nod Org | 1534         | 54.94       | -25.4                            |
| SC67-NOD 6               | Nod Org | 1534         | 54.94       | -25.5                            |
| SC351-NOD4               | Nod Org | 1532         | 54.95       | -25.3                            |
| SC67-NOD5                | Nod Org | 1527         | 54.96       | -25.1                            |
| SC351-NOD2               | Nod Org | 1525         | 54.96       | -25.4                            |
| SC351-NOD1               | Nod Org | 1524         | 54.97       | -25.4                            |
| SC67-NOD4                | Nod Org | 1524         | 54.97       | -25.4                            |
| SC67-NOD3                | Nod Org | 1520         | 54.97       | -25.6                            |
| SC 23                    | Nod Org | 1495         | 55.03       | -25.0                            |
| SC 80                    | Nod Org | 1495         | 55.03       | -24.9                            |
| SC 80-L                  | Nod Org | 1492         | 55.03       | -25.1                            |
| SLW 9715                 | Cuticle | 1470         | 55.08       | -24.2                            |
| SC 22                    | Nod Org | 1460         | 55.10       | -25.0                            |
| SC 20                    | Nod Org | 1380         | 55.26       | -25.3                            |
| SC 117-above             | Nod Org | 1380         | 55.26       | -24.8                            |
| PK-N-1380-1              | Nod Org | 1380         | 55.26       | -25.1                            |
| SC 176                   | Nod Org | 1355         | 55.31       | -24.2                            |
| SC 176                   | Nod Org | 1355         | 55.31       | -24.3                            |
| SLW 992                  | Cuticle | 1195         | 55.65       | -25.7                            |
| SLW 993                  | Cuticle | 1195         | 55.65       | -24.3                            |
| SC 179                   | Nod Org | 1080         | 55.88       | -24.6                            |
| SC191                    | Nod Org | 1015         | 56.01       | -25.3                            |
| SC 185                   | Nod Org | 940          | 56.16       | -24.4                            |
| SC 85                    | Nod Org | 860          | 56.31       | -22.5                            |
| SC 165                   | Nod Org | 820          | 56.39       | -25.6                            |
| SC 198                   | Nod Org | 760          | 56.61       | -25.4                            |
| SC 279                   | Nod Org | 680          | 56.90       | -25.4                            |
| SC 242                   | Nod Org | 590          | 57.23       | -24.5                            |
| SC 246                   | Nod Org | 520          | 57.48       | -23.9                            |
| <b>S. Bighorn Basin</b>  |         |              |             |                                  |
| SLW 8822                 | Cuticle | 621          | 52.83       | -28.9                            |
| SLW 8822                 | Cuticle | 621          | 52.83       | -28.5                            |
| SLW 8822                 | Cuticle | 621          | 52.83       | -27.2                            |
| SLW 8822                 | Cuticle | 621          | 52.83       | -27.2                            |
| LJH 9915                 | Cuticle | 429          | 54.56       | -26.3                            |
| SLW 882                  | Cuticle | 420          | 53.35       | -27.7                            |
| SLW 882                  | Cuticle | 420          | 53.35       | -27.6                            |
| SLW 882                  | Cuticle | 420          | 53.35       | -27.8                            |
| SLW 882                  | Cuticle | 420          | 53.35       | -27.7                            |
| SLW H                    | Cuticle | 420          | 53.35       | -26.9                            |
| DCF                      | Cuticle | 353          | 53.53       | -26.6                            |
| DCF                      | Cuticle | 353          | 53.53       | -26.1                            |
| SLW 826                  | Cuticle | 90           | 54.61       | -28.7                            |
| SLW 826                  | Cuticle | 90           | 54.61       | -28.5                            |
| SLW 826                  | Cuticle | 90           | 54.61       | -28.8                            |
| SLW 9050                 | Cuticle | -25          | 55.08       | -27.0                            |
| SLW 9434                 | Cuticle | -30          | 55.10       | -22.5                            |
| SLW 9411                 | Cuticle | -50          | 55.18       | -23.8                            |
| SLW 9155                 | Cuticle | -100         | 55.38       | -29.8                            |

Note: Nod Org, organic matter in carbonate nodules.
